# Supplementary material for: Evaluating Microphysics and Boundary Layer Schemes in WRF: Assessment of 36 Scheme Combinations for 17 Major Storms in Saudi Arabia
Source: Copernicus journal article supplement (doi:10.5194/egusphere-2025-912), 2025-04-03
Supplement: Supplementary file 1 [file egusphere-2025-912-supplement.pdf]

# Supplementary: Evaluating Microphysics and Planetary Boundary Layer Schemes in WRF

Rajesh Kumar Sahu<sup>1</sup>, Hamza Kunhu Bangalath<sup>1</sup>, Suleiman Mostamandi<sup>1</sup>, Jason Evans<sup>2</sup>, Paul Kucera<sup>3</sup>, and Hylke E. Beck<sup>1</sup>

<sup>1</sup>Physical Science and Engineering Division, King Abdullah University of Science and Technology (KAUST), Thuwal, Saudi Arabia

<sup>2</sup>Climate Change Research Centre, University of New South Wales, Sydney, Australia

<sup>3</sup>Research Applications Laboratory, National Center for Atmospheric Research, Boulder, Colorado, USA

**Correspondence:** Hylke E. Beck (hylke.beck@kaust.edu.sa)

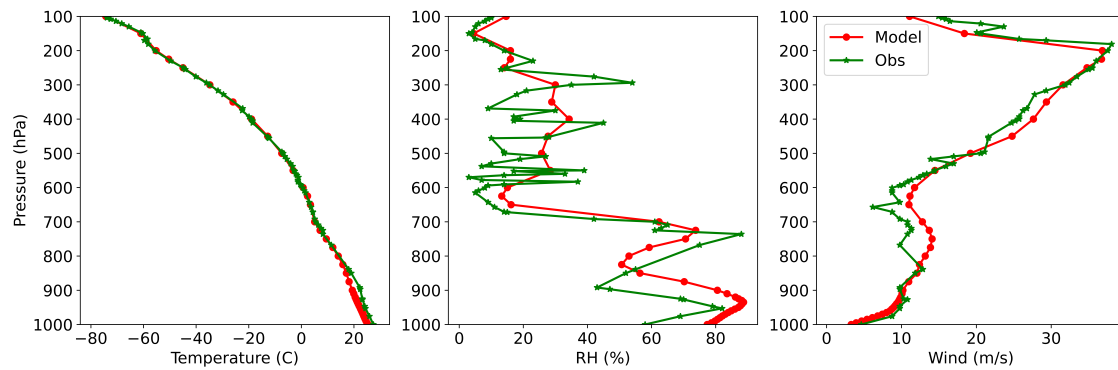

**Figure S1.** Vertical meteorological parameters over Jeddah on 24th November 2022: temperature (°C), relative humidity (%), and wind speed (m/s), comparing WRF model simulations with radiosonde observations.

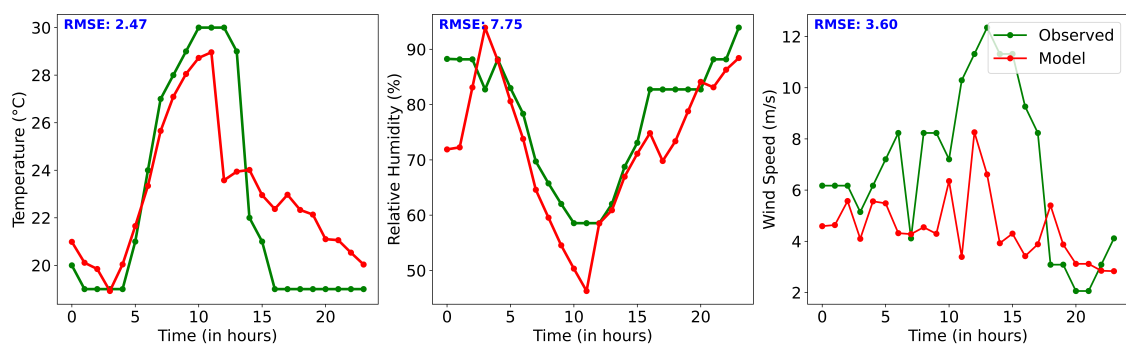

**Figure S2.** Surface meteorological parameters over Hafr Al Batin on 27th October 2019: temperature (°C), relative humidity (%), and wind speed (m/s), comparing WRF model simulations with IOWA station observations.

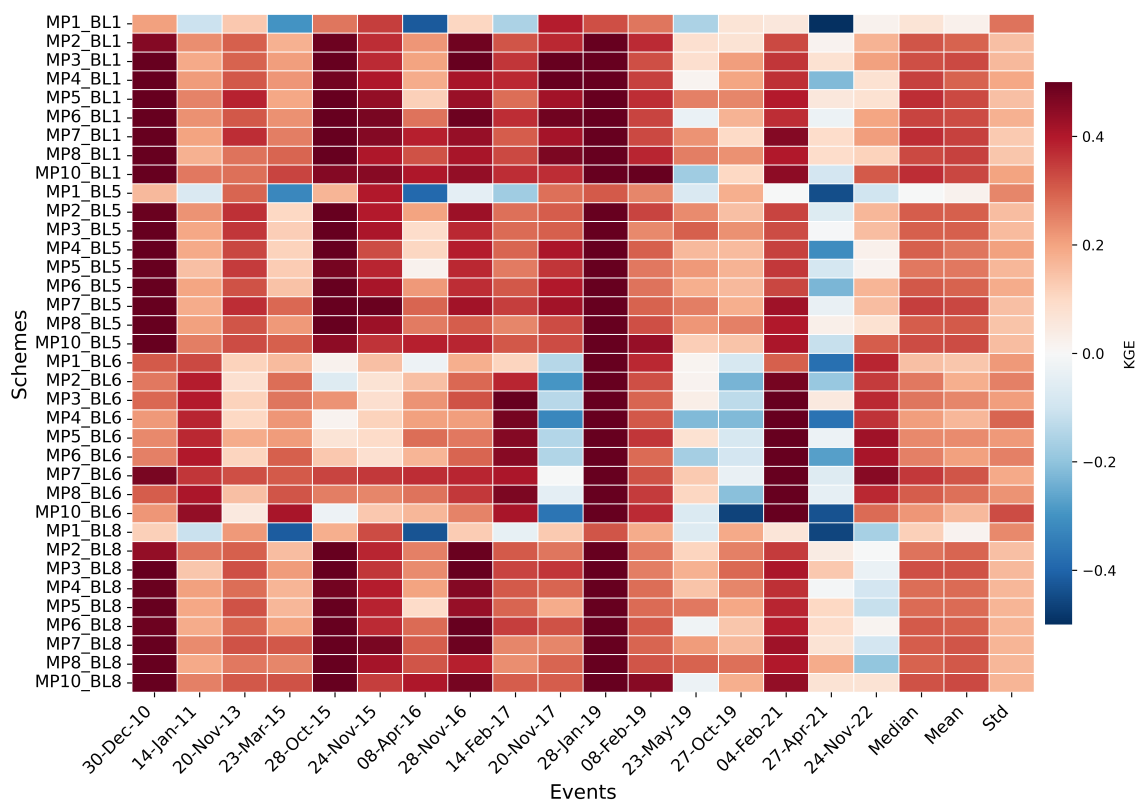

**Figure S3.** Spatial KGE scores for precipitation of 36 schemes combined for 17 EREs.

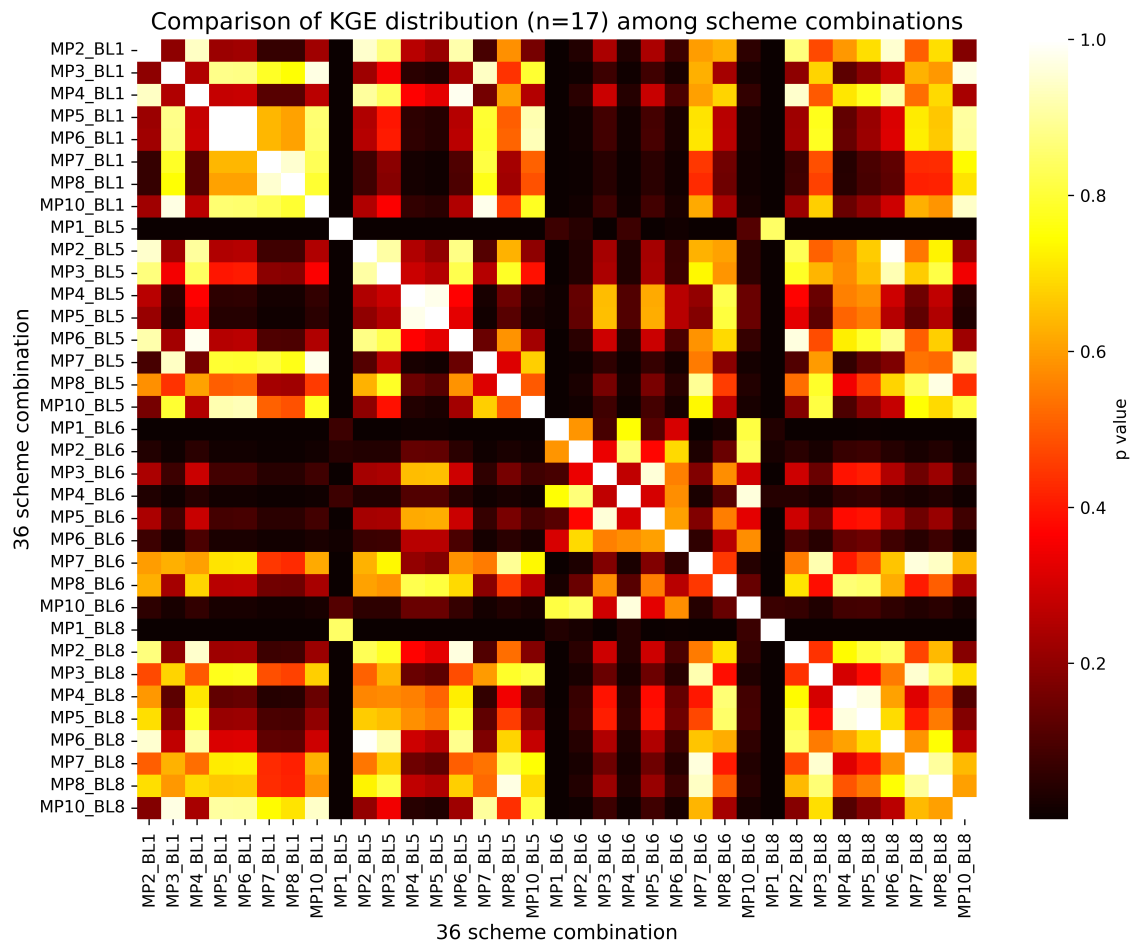

**Figure S4.** Pairwise p-values from independent t-tests comparing the  $\Delta$ KGE distributions of 36 scheme combinations for rainfall spatially.  $\Delta$ KGE values were calculated by subtracting the mean KGE across events from the KGE values. A p-value threshold of 0.1 was used to identify statistically significant differences between scheme combinations
