# Supplementary material for: Evaluating Microphysics and Boundary Layer Schemes in WRF: Assessment of 36 Scheme Combinations for 17 Major Storms in Saudi Arabia
Source: Copernicus journal article supplement (doi:10.5194/egusphere-2025-912), 2025-04-03
Supplement: Supplementary file [file egusphere-2025-912-AC3-supplement.pdf]

# **Pointwise replies to reviewer's comments on the manuscript “Evaluating Microphysics and Boundary Layer Schemes in WRF: Assessment of 36 Scheme Combinations for 17 Major Storms in Saudi Arabia” (egusphere-2025-912)**

## **Response to the comments of Reviewer 2**

We are very grateful for the valuable suggestions from the reviewer. The changes addressed by the reviewer have been carefully incorporated into the manuscript in the following manner:

**Comment 1:** Please make sure that you clearly distinguish between “schemes” and combinations as this is very confusing for the reader.

**Response:** Thank you for the feedback. We went through the paper once again and ensured we used the right terminology throughout the manuscript: schemes for individual physical parameterization schemes (e.g., specific PBL or MP schemes) and combinations for scheme combinations (e.g., a specific pairing of PBL and MP schemes).

**Comment 2:** Please make sure that you do not repeat the explanations of the MP and BL option combinations. Explaining them once and then use “MP8\_BL1” throughout the manuscript should be sufficient.

**Response:** Thank you for your suggestion. We have revised the manuscript to remove repeated explanations of the MP and PBL option combinations.

**Comment 3:** Figure captions in the continuous text should start with “Fig.” instead of “Figure”. “Figure” is only used at the beginning of a sentence.

**Response:** Thank you for the clarification. We have revised all figure references accordingly. We now use Fig. or Figs. consistently.

**Comment 4:** What is your final recommendation regarding the combination of PBL and MP? This should be mentioned as this is an important outcome of your study.

**Response:** Thank you for highlighting this important point. We agree that the final recommendation regarding the optimal combination of PBL and MP schemes is a key outcome of the study and should be clearly stated, and we have clearly emphasized this recommendation in the abstract, conclusion, and relevant discussion sections of the manuscript (Line 11-12, 380-391).

**Comment 5:** Manuscript title: Please include the WRF version you are using as different WRF versions can lead to different results.

**Response:** We appreciate the suggestion, and agree that different versions can lead to different results. We have added the version (WRF-ARW v4.4) in the manuscript title.

**Comment 6:** Line 5: I think “convection-permitting” is more widely used than “convective-permitting”.

**Response:** Thank you for the suggestion. We agree and have revised “convective-permitting” to “convection-permitting” throughout the manuscript to align with widely accepted terminology and ensure consistency (Table 1, Line 6, and 67).

**Comment 7:** Line 11: Where are the “21” combinations are coming from? The abstract suggest you performed 36 combinations.

**Response:** Thank you for your observation. The sentence refers to the results presented in Section 4.4, where statistical testing demonstrated that the Thompson–YSU combination performed significantly better than 21 out of the 36 scheme combinations evaluated in the study. We have clarified this point in the manuscript to avoid any ambiguity.

**Comment 8:** Line 20: Are there more recent publications which cover the aspect of climate change?

**Response:** Thank you for the comment. We acknowledge that more recent studies addressing the impacts of climate change on extreme rainfall events (EREs) are available. Accordingly, we have updated the references in Line 20 to include recent and relevant publications, thereby strengthening the contextual foundation of our study (Line 23).

Muller, C., & Takayabu, Y. (2020). Response of precipitation extremes to warming: what have we learned from theory and idealized cloud-resolving simulations, and what remains to be learned?. *Environmental Research Letters*, 15(3), 035001.

Fowler, H. J., Lenderink, G., Prein, A. F., Westra, S., Allan, R. P., Ban, N., ... & Zhang, X. (2021). Anthropogenic intensification of short-duration rainfall extremes. *Nature Reviews Earth & Environment*, 2(2), 107-122.

Neelin, J. D., Martinez-Villalobos, C., Stechmann, S. N., Ahmed, F., Chen, G., Norris, J. M., ... & Lenderink, G. (2022). Precipitation extremes and water vapor: Relationships in current climate and implications for climate change. *Current Climate Change Reports*, 8(1), 17-33.

**Comment 9:** Line 33: “can feed early warning systems”

**Response:** Thank you for the suggestion. We have revised the sentence and believe to enhance clarity and improve readability (Line 31-33).

**Comment 10:** Line 36: “inform” seems not an appropriate word here.

**Response:** Thank you for the feedback. We have revised the sentence (Line 33).

**Comment 11:** Line 37: The acronyms “AP” and “WRF” are not explained. Please ensure that all acronyms are explained before they are used in the manuscript. Also add the reference for the WRF model here.

**Response:** Thank you for the helpful comment. We have defined the acronyms “AP” (Arabian Peninsula) and “WRF-ARW” (Advanced Research version of the Weather Research and Forecasting) at their first occurrence in the manuscript. In addition, we have included the appropriate reference for the WRF model in this section to ensure proper attribution and context (Line 34-35).

**Comment 12:** Line 37: “Numerical Weather Prediction (NWP) model”...

**Response:** Thank you for the comment. We have revised the sentence to introduce WRF as a “Numerical Weather Prediction (NWP) model” (Line 35).

**Comment 13:** Line 41: The microphysics also have an impact on radiation.

**Response:** Thank you for the suggestion. In response, we have revised the sentence in the manuscript to: “The MP scheme controls cloud formation, precipitation processes, and interactions between different water phases. It also influences radiative transfer by affecting cloud optical properties such as droplet size distribution, phase, and concentration.” (Lines 51-53)

**Comment 14:** Line 53: “to evaluate the best combination”....

**Response:** Thank you for the suggestion. As recommended, we have rephrased the sentence from “to establish the best combination” to “to determine the best combination” as we felt “determine” was more fitting (Line 67).

**Comment 15:** Line 56: “using WRF in a two-way nested”... What was your motivation to apply a two-way nesting approach?

**Response:** Thank you for the comment. We used a two-way nesting approach to allow feedback between the high-resolution inner domain and the coarser parent domain. This is essential for capturing small-scale processes like convection, PBL turbulence, and orographic effects, which can influence larger-scale circulation. The dynamic interaction improves physical consistency and

is crucial for realistically simulating mesoscale convective systems (MCS) and associated precipitation.

**Comment 16:** Line 66: I do not think that number 9 is a key question of your study.

**Response:** We appreciate the comment. However, after careful consideration, we have decided to retain question number 9, as we believe it complements the broader context of our study. However, we have clarified its relevance to the core objectives within the discussion to ensure focus and coherence.

**Comment 17:** Line 69: “spans from 16°N to 33°N and 34°E to 56°E”

**Response:** Thank you for the suggestion. We have revised the statement (Line 83).

**Comment 18:** Starting line 73: The readers may be not familiar with all the different regions of the Arabian Peninsula and Saudi Arabia. I think it would be good to add at least some of the regions and major cities you mentioned to Fig. 1.

**Response:** We have updated Figure 1 to include key locations such as Riyadh, Jeddah, Hafr Al-Batin, Tabuk, Mecca, Medina, Najran, Jizan and Abha, supporting easier interpretation of the results (Line 92-93).

**Comment 19:** Table 1: The study of Schwitalla et al. (2020) is the only experiment in your table with a convection-permitting model resolution. This should be mentioned in the table itself (maybe as a separate column) and/or in the text. Please consider to add the number of model layers of the different studies as this can help the reader to further interpret your findings.

**Response:** Thank you for your valuable suggestions. We have updated Table 1 to highlight that the study by Schwitalla et al. (2020) is the only one among the listed references that employed a convection-permitting model resolution. Additionally, we have added a new column titled “Model layer/ Vertical levels used” to indicate the number of model layers used in each study, where such information was available. We have also added a discussion on this particular aspect in the main text (Line 205-213).

**Comment 20:** Line 94: Did you use ERA5 pressure or model level data for the initialization of the model? This has influence on the accuracy of the initial conditions as the number of model levels in ERA5 is about 100 up to 30 km while the number of pressure levels is 32 up to approximately. 30 km altitude. If you use pressure level data, please explain your decision.

**Response:** We appreciate the insightful comment. We used ERA5 pressure-level data (37 levels) for initializing and forcing the WRF model. While ERA5 model-level data are available and offer higher vertical resolution (137 levels), we opted for pressure-level data due to computational and practical constraints.

Our experiment involved 612 high-resolution (3 km) convection-permitting simulations – derived from 36 physics scheme combinations across 17 EREs. Incorporating model-level data in this context would have significantly increased data volume, preprocessing time, and simulation runtime, making the overall workflow infeasible given our available resources. Moreover, our goal was to assess inter-scheme sensitivity in precipitation simulation, for which pressure-level data have been used widely and successfully.

**Comment 21:** Line 101: Radiosonde stations are plotted in Fig. 1 but were never used or described explicitly throughout the manuscript. Or are they included in the analysis shown in sec. 4.6? If yes, I think it is dangerous to combine them together as you would combine prognostic (3D) variables with diagnostic (2D) variables. Did you consider differences between the station altitude and the model orography in case stations are located in the mountains? If this difference is large, this can alter your results for T, RH, and WS.

**Response:** Thank you for your detailed observation. We acknowledge the potential confusion caused by the inclusion of radiosonde station locations in Figure 1. To clarify, we did not use any radiosonde data at any point in the study—including in Section 4.6. The radiosonde locations were initially included in Figure 1 for geographical context, but since they are not part of the analysis, we agree that their inclusion may be misleading. In response to your suggestion, we have removed the "radiosonde locations" from Figure 1, and the updated figure now shows only the METAR station locations.

The surface observations used in Section 4.6 are exclusively from METAR stations, obtained via the 

|  |      |               |         |
|--|------|---------------|---------|
|  | Iowa | Environmental | Mesonet |
|--|------|---------------|---------|

 ([https://mesonet.agron.iastate.edu/request/download.phtml?network=SA\\_\\_ASOS](https://mesonet.agron.iastate.edu/request/download.phtml?network=SA__ASOS)). These datasets provide 2D diagnostic variables such as temperature (2 m), relative humidity (2 m), and wind speed (10 m), which are used to validate the WRF model outputs at corresponding levels. We also agree with your concern that combining 3D radiosonde data with 2D surface diagnostics, particularly in mountainous regions, can lead to significant errors if altitude differences are not accounted for. Since we use only METAR surface data, such altitude mismatches between station height and model terrain are not relevant in our case.

**Comment 22:** Line 108: WRF version 4.4.0?

**Response:** Thank you for pointing this out. We confirm that all simulations were conducted using WRF version 4.4, and the manuscript has been updated to mention this in the abstract and the Data and Methods section (Line 119).

**Comment 23:** Line 110: Please add the corresponding number of grid cells and the model top pressure here and to Table 3.

**Response:** Thank you for the suggestion. The model top pressure used in our simulations was 3000 Pa (30 hPa). The number of horizontal grid cells was  $493 \times 418$  for the parent domain (D01) and  $1012 \times 889$  for the nested domain (D02). We have updated both the text at line 110 and Table 3 to include this information (Line 120-122).

**Comment 24:** Line 120: The Kessler scheme is an extremely old scheme. Please consider whether it is necessary to apply this in your study on a convection-permitting resolution. It is preferably used in idealized cloud modeling studies.

**Response:** Thank you for the insightful comment. We acknowledge that the Kessler scheme is a relatively simpler microphysics parameterization, primarily designed for warm-rain processes and often used in idealized cloud modeling studies. However, in our study, we included it as a baseline reference to compare the performance of more advanced MP schemes. This allows us to better highlight the improvements offered by more physically comprehensive schemes under convection-permitting resolutions.

**Comment 25:** Line 130: the simulations were run for 84 hours with a 48 hour spin-up followed by a 24h forecast. Why did you run the model for 84 hours? Did you reinitialize the atmosphere after your 48h spin-up?

**Response:** Thank you for your question. The model was run continuously for 84 hours without reinitialization. The first 48 hours were treated as a spin-up period, and the following 24-hour window (hours 49–72) was used for evaluation and comparison with observations.

The additional 12 hours (hours 73–84) were included to allow flexibility in capturing the full evolution of EREs, particularly in cases where the peak precipitation may extend slightly beyond the 72-hour mark. This precaution ensured that the forecast window did not truncate significant rainfall signals near the end of the evaluation period. However, only the 24-hour forecast period (49–72 h) was used for performance assessment in this study.

**Comment 26:** Figure 1: Please use a different color table as there is too much blue color in the figure. Depending on the printer, it can be difficult to see the red markers on a blue background. Also, add the METAR stations here as this is important for the interpretation of your results.

**Response:** Thank you for your helpful suggestion. We have revised Figure 1 and changed the colors to enhance clarity and accessibility. Additionally, we have included the locations of the METAR stations used in our analysis.

**Comment 27:** Table 2: It would be great if you could add the rainfall amount for all cases. Otherwise it is difficult for the reader to judge the level of extreme of the particular event. It really matters if you have 200 mm within a day of more than 40 mm in 30 min.

**Response:** Thank you for the valuable suggestion. We agree that including rainfall amounts is important for evaluating the severity of each event, as also suggested by Reviewer #1. Accordingly, we have added a new column to Table 2 showing the IMERG maximum rainfall for each case.

**Comment 28:** Table 3: Does the Arakawa-C grid play a role in your study? As far as I know it cannot be changed anyway. Also, the reference for the NOAH LSM is missing here. Regarding the CU scheme: I think you mean that for D02 no CU scheme is used.

**Response:** You are correct that the Arakawa-C grid is a fixed configuration in WRF and cannot be modified by the user. Accordingly, we have removed this entry from Table 3, as it does not provide value to the reader. We have also added the appropriate reference for the NOAH land surface model (Chen and Dudhia, 2001) to both the table and the references section. Regarding the cumulus parameterization (CU) scheme, we confirm that it was applied only in the parent domain (D01), while no CU scheme was used in the nested domain (D02). This clarification has been added to Table 3 to prevent any confusion.

**Comment 29:** Regarding the model setup: Did you use the default data sets for soil texture and land cover? This should be mentioned either in Table 3 or in the text.

**Response:** Yes, we used the default WRF datasets for both soil texture and land cover. Specifically, the United States Geological Survey (USGS) 21-category land use dataset and the default soil texture data provided with the WRF Preprocessing System (WPS) were employed. We have updated the manuscript to include this information in both the model setup description and Table 3.

**Comment 30:** Line 140: Please add a short sentence about what a perfect KGE would be. I guess 1 is ideal. What does a KGE of 0.5 tell us (most of the values are below this threshold)? Did you interpolate the simulated precipitation from the WRF model to the IMERG grid? If it was done the other way round, I doubt that this is meaningful. Which interpolation method did you use (bilinear, conservative, nearest neighbor, etc.)? Please also mention the tool or software package used for interpolation.

**Response:** A perfect Kling-Gupta Efficiency (KGE) score is 1.0, indicating perfect agreement between simulated and observed data. A KGE of 0.5 suggests good agreement, given that a hypothetical baseline simulation predicting only the mean would achieve a KGE of -0.41 (Knoben et al., 2019), making our results quite reasonable, situated between this baseline and an (unattainable) perfect score (KGE of 1). To enable a grid-point-to-grid-point comparison with IMERG observations, we resampled the WRF-simulated precipitation data to the IMERG grid using averaging. This interpolation was performed using the xarray package in Python (Hoyer and Hamman, 2017). We have added these clarifications to the manuscript to enhance the transparency and reproducibility of our methodology (Line 156-158, 163-165).



Knoben, W. J., Freer, J. E., & Woods, R. A. (2019). Inherent benchmark or not? Comparing Nash–Sutcliffe and Kling–Gupta efficiency scores. *Hydrology and Earth System Sciences*, 23(10), 4323–4331.

Hoyer, S., & Hamman, J. (2017). xarray: ND labeled arrays and datasets in Python. *Journal of Open Research Software*, 5(1), 10–10.

**Comment 31:** Line 142: Isn't  $\gamma$  the ratio of the variances? “Coefficient of variation” sound a bit inappropriate.

**Response:** Thank you for the comment.  $\gamma$  is not the ratio of variances, but rather the ratio of the coefficients of variation (CV), which accounts for both standard deviation and mean. We agree that the term “coefficient of variation” alone may be unclear in this context, and we will revise the text to explicitly state that  $\gamma$  represents the ratio of the coefficients of variation of the simulated and observed data to improve clarity (Line 156–157).

**Comment 32:** Line 145: What was your motivation to use the nearest model grid cell next to the surface observations instead of, e.g., a distance-weighted 3×3 average? I think you cannot expect that the model can simulate your observation 1:1.

**Response:** We used the nearest model grid cell to each surface observation station to preserve a direct spatial correspondence and retain the raw, localized model signal. While we acknowledge that a distance-weighted 3×3 average could smooth out local variability and possibly offer a more representative comparison in complex terrains or heterogeneous conditions, our primary goal was to evaluate the model's point-level performance without introducing additional spatial averaging.

Moreover, we tested both approaches (nearest-neighbor and 3×3 distance-weighted average) and found that the latter did not result in a significant improvement in our evaluation metrics. Therefore, for consistency and clarity, we proceeded with the nearest grid point approach.

**Comment 33:** Lines 148–161: Please consider to integrate both paragraphs (or parts of them) to the introduction. I think it better fits there rather than in the discussion section.

**Response:** Thank you for your suggestion. We agree that integrating the discussion of PBL and MP schemes (Lines 148–161) into the introduction would offer readers earlier context regarding their significance in simulating EREs. We have revised the manuscript accordingly (Line 43–49).

**Comment 34:** Line 169–170: you mention that both MYNN schemes and the BouLac scheme rely on the representation of gradients. As you only have coarse 53 model levels, could the explain the detrimental performance of the MYNN and BouLac simulations?

**Response:** Thank you for this observation. As noted, both MYNN and BouLac, which are TKE-based and largely rely on local vertical gradients to accurately represent turbulent mixing. In our



setup, we used 53 vertical levels, which is a commonly adopted configuration. While this resolution provides a reasonable balance between detail and computational cost, it may not capture fine-scale vertical structures to the same extent as higher-resolution configurations.

We have already addressed this aspect in the manuscript (Lines 209-210), where we contrast our findings with Schwitalla et al. (2020), who used 100 vertical levels and reported better performance for the BL5 scheme. We note that differences in vertical resolution, along with ERE characteristics and surface conditions, likely contributed to the contrasting performance of BL5. This context has now been further clarified in the revised text to ensure alignment with the discussion on PBL scheme performance.

**Comment 35:** Line 184: What is a “Stratified” BL?

**Response:** Thank you for pointing this out. The term “stratified” BL refers to a BL with stable stratification—typically observed at night or over surfaces experiencing strong cooling—where vertical mixing is limited due to temperature inversions. To improve clarity and avoid ambiguity, we have revised the wording in the manuscript to “stably stratified BL” which more accurately describes the underlying physical process.

**Comment 36:** Line 185: This is in contrast to the study of Schwitalla et al. (2020) which you mentioned in Table 1.

**Response:** Thank you for the excellent point. Schwitalla et al. (2020) examined a single summertime convective event on 14 July 2015 over the Arabian Peninsula using a physics ensemble analysis. In contrast, our study covers 17 EREs across Saudi Arabia. This larger sample size enhances the statistical significance of our findings and tests scheme robustness under varied synoptic conditions.

Therefore, our identification of the YSU PBL and Thompson MP combination as optimal is based on consistent performance across multiple independent events, making it more generalizable than conclusions drawn from a single-case study.

We have now clarified this distinction in the revised manuscript (Line 205-214)

**Comment 37:** Line 201-204: I think this extensive explanation is not necessary here. You may introduce the abbreviations already in Table 3. This allows for saving space.

**Response:** Thank you for the suggestion. We agree that the extended explanation in the main text is redundant, given that the abbreviations are already clearly defined in Table 3. We have removed the full forms from this section and now refer only to the abbreviations (Line 218).

**Comment 38:** Line 205: “MP” is used for a microphysics scheme. Please write “cloud microphysics” instead.

**Response:** Thank you for the suggestion. To enhance clarity and avoid ambiguity, especially for readers who may not be familiar with the abbreviation, we have revised the wording to replace “MP” with “cloud microphysics (Line 219-220).”

**Comment 39:** Line 217: See my comment to line 201-204.

**Response:** Thank you once again for your helpful comment. As noted in our response to the comment about Lines 201–204 of the manuscript, the full forms of the abbreviations are already provided in Table 3. We have removed the repeated explanations from this section as well (Line 231).

**Comment 40:** Line 218: Which advanced microphysical processes?

**Response:** By “advanced microphysical processes,” we refer to the inclusion of detailed representations such as including graupel and hail processes, multiple ice-phase species, prognostic treatment of various hydrometeors, and more complex interactions between cloud and rainfall particles (Line 232-233).

**Comment 41:** Line 221: Which sensitivities?

**Response:** We have rewritten this part to enhance the clarity and readability. The revised text does not include “sensitivities.”(Line 235-237).

**Comment 42:** Line 230: I guess you mean “combination” instead of “scheme”.

**Response:** Thank you for pointing this out. Corrected (Line 245).

**Comment 43:** Lines 231-232: Do the numbers show the absolute value of the mean of “ $r-1$ ”? This is a bit confusing to the reader. Regarding the KGE: Did you account for a potential “double-penalty” of your model? In case the extreme precipitation is shifted by one grid cell in the model, the KGE may deteriorate.

**Response:** Thank you for the comment. This is not entirely correct. As mentioned in the text, the numbers represent the mean of the absolute values of  $r-1$ . This calculation was necessary to compare the values of  $r$ ,  $\beta$ , and  $\gamma$ . Regarding the double-penalty effect, the KGE is sensitive to it, through the  $r$ . However, the  $\beta$  and  $\gamma$  components of the KGE are not sensitive to this.

**Comment 44:** Figure 3: What do you mean with “long-term bias” in the caption of Figure 3? In the second line of the figure caption, it should be “combination” instead of “scheme”.

**Response:** In the caption of Figure 3, the term “long-term bias” refers to the bias component ( $\beta$ ) of the KGE, which quantifies the ratio of mean simulated to mean observed precipitation and other meteorological parameters over the evaluation period. To enhance clarity, we have revised the

caption to use the term “bias” instead of “long-term bias.” Additionally, we have replaced “scheme” with “combination.”

**Comment 45:** Line 247: “(See later Fig. 5)”.

**Response:** Thank you for pointing this out. Corrected (Line 261, 307).

**Comment 46:** Line 260: You refer to Fig. S4 before Fig. S3 is used. I think the order of the two supplementary figures need to be changed.”

**Response:** Thank you, we have corrected it.

**Comment 47:** Line 279: Which data sets are you referring to? It is unclear.”

**Response:** The term “datasets” refers to satellite rainfall datasets that can potentially be used to quantify the uncertainty. We have modified the sentence for clarity. The sentence now reads as follows: “Due to the strong correlation between different microwave satellite-based rainfall datasets — such as IMERG, GSMaP (Kubota et al., 2024), and CMORPH-CDR (Xie et al., 2019) — and the fact that IMERG-Final V7 significantly outperforms other satellite datasets (Wang et al., 2025b), we were unable to quantify the uncertainty arising from the choice of reference data.” (Line 280-286)

**Comment 48:** Line 280: Did you consider the random error provided in the IMERG data set?

**Response:** We did not consider the random error provided in the IMERG dataset. This is a great idea, however, it is beyond the scope of the current study, although we may explore using it in a follow-up study.

**Comment 49:** Lines 285-292: It may be worth considering to integrate parts of this paragraph to the conclusion section.

**Response:** Thank you for the suggestion. We have added a line to the conclusions section (Line 403-406).

**Comment 50:** Line 295: Can you really conclude this from your study? Precipitation is the end product of a long chain of processes which can have compensating errors. As pointed out earlier, if you mix both 2D and 3D variables here, this can be misleading.

**Response:** Thank you for this critical comment. We understand the concern regarding potential misinterpretation when combining precipitation with variables of differing dimensionality, which may introduce compensating errors. However, in this section, our analysis is strictly limited to 2D surface observations from METAR stations, including 2-m temperature, 2-m relative humidity,

10-m wind speed, and GPM-IMERG surface precipitation. No 3D atmospheric variables — such as vertical profiles from radiosondes — were included.

**Comment 51:** Line 314-315: “WRF model has indicated...”. This sentence sounds a bit awkward.

**Response:** Agreed. After careful reconsideration, we have decided to remove this sentence, as it did not follow naturally from the preceding paragraph, and did not support its arguments.

**Comment 52:** Line 321: “The WRF model...”

**Response:** Thank you for the comment. We have revised the sentence beginning with “The WRF model... (Line 324)”

**Comment 53:** Line 327: Which simplifications? Please elaborate.

**Response:** We have elaborated on the specific simplifications and revised the sentence as follows:

“First, potential deficiencies in the MP, BL, and convection schemes—along with model simplifications such as the absence of data assimilation, limited land surface complexity, simplified radiation and turbulence parameterizations, and the exclusion of aerosol–cloud interactions—may contribute to inaccuracies in simulating moisture convergence and convective updrafts (Taraphdar et al., 2021; Attada et al., 2022). These limitations include simplified representations of land–atmosphere interactions, unresolved sub-grid processes, and the use of prescribed lateral boundary conditions updated every 6 hours, which may not fully capture fast-evolving or small-scale features entering the domain” (Line 329-333)

**Comment 54:** Line 337: “the best performing combination in terms of rainfall”.

**Response:** Thank you for your comment. Modified as suggested (Line 343).

**Comment 55:** Figure 6: Showing negative values for accumulated precipitation is not reasonable. Please start with 0 mm or 1 mm.

**Response:** We agree and have adjusted the color scale in Figure 6 to begin at 0 mm, ensuring that only valid, non-negative precipitation values are shown in the figure.

**Comment 56:** Lines 340-344: These sentences are confusing. It is not clear to me what you want so say here, especially in relation to the best performing combination.

**Response:** Thank you for bringing this to our attention. The KGE consists of three components, of which we want to compare the magnitude, so we can make statements regarding the relative importance of each in the final KGE scores. After careful consideration, we have revised this

subsection to enhance the clarity, as we agree it was rather confusing, and we did not answer the main question addressed in this subsection.

**Comment 57:** Figure 7: "... from WRF using the best performing..."

**Response:** Thank you for your suggestion. Changed.

**Comment 58:** Line 345: The part of the sentence in parentheses can be deleted as this is already explained in line 336.

**Response:** Thank you for the suggestion. Done (Line 350).

**Comment 59:** Line 350: "... for the 17 EREs is 0.20 (not shown)...". I also would not call the values of "r-1" scores. In my opinion, it is simply a value.

**Response:** Thank you for your careful observation. We have replaced "scores" with "values" when referring to the harmonized KGE component values.

**Comment 60:** Section 4.9: It this really relevant for your study? My personal feeling is that this is a bit out of scope.

**Response:** Thank you for your comment. We acknowledge your concern regarding the relevance of Section 4.9. However, we have chosen to retain this section, as it provides a synthesis of the key findings in relation to our research objectives and supports the overall flow of the manuscript. We believe it adds value by reinforcing the interpretation of results and guiding the broader implications of our analysis.

**Comment 61:** Line 374: What is a "high-performing scheme"?

**Response:** We have revised the sentence as follows:

"Thus, while several studies employed schemes previously shown to perform well in similar regional contexts, others might have improved simulation accuracy by incorporating the YSU BL scheme and advanced MP schemes identified as effective in our study." (Line 372-374)

**Comment 62:** Section 4.10: Maybe this can be integrated to the conclusion section?

**Response:** We appreciate the comment. We have removed Section 4.10, as per the suggestion by Reviewer 1.

**Comment 63:** Line 389: Please give an example for arid or semi-arid regions with similar characteristics.

**Response:** Thank you for the suggestion. We have removed Section 4.10, as per the suggestion by Reviewer 1.

**Comment 64:** Line 396: Other boundary layer schemes...

**Response:** Revised as follows:

“The YSU (BL1) scheme outperformed the other BL schemes, achieving a temporal KGE of 0.43 and a spatial KGE of 0.29.” (Line 382-383)

**Comment 65:** Line 402-407: Did you consider investigating cloud properties like integrated cloud water content (e.g., from CMSAF CLAAS: [https://doi.org/10.5676/EUM\\_SAF\\_CM/CLAAS/V003](https://doi.org/10.5676/EUM_SAF_CM/CLAAS/V003))? This can give you a hint of what is happening inside the MP schemes with respect to the cloud formation and thus precipitation.

**Response:** We really appreciate the suggestion. We acknowledge that investigating cloud properties such as integrated cloud water content could offer important insights into the internal behavior of MP schemes, particularly in terms of cloud formation and its relationship to precipitation. However, this study focused on an integrated evaluation using the KGE metric to assess overall model performance across multiple surface variables and precipitation. Nevertheless, we recognize the value of incorporating cloud property diagnostics and will consider this in future work on this topic.

**Comment 66:** Line 423: “This underlines the complexity...”. Also radiation has an impact on cloud evolution.

**Response:** We have revised the sentence to reflect this added complexity:

“This underlines the complexity of model parameterization, particularly as cloud evolution is influenced not only by PBL and MP schemes but also by radiative processes, emphasizing the need for further integrated research” (Line 412-414)

**Comment 67:** Line 425: Only for a particular physics combination.

**Response:** We have revised the sentence for clarity as follows:

“For the best-performing physics combination (MP8\_BL1), the spatial patterns of simulated and observed rainfall were generally well captured, although occasional overestimations and underestimations were noted. These discrepancies are likely attributable to limitations in the boundary conditions (ERA5 forcing) and uncertainties associated with the IMERG satellite-based reference dataset.” (Line 416-419)

**Comment 68:** Line 432: As already mentioned, please reconsider if this part/question is necessary and gives a benefit. This is not a conclusion.

**Response:** Thank you for the comment. We have retained this part and rephrased the question and response to better align with the conclusion. The revised version reads:

“How do the PBL and MP schemes used in previous studies compare with those identified as optimal in our evaluation?”

Our findings align with several previous studies in the Middle East that employed the YSU PBL scheme, reinforcing its effectiveness for simulating regional atmospheric dynamics. At the same time, our results suggest that studies using simpler MP schemes—such as Lin (MP2) or Eta Ferrier (MP5)—may achieve improved simulation accuracy by adopting more advanced schemes like Thompson (MP8).” (Line 426-430)

**Comment 69:** Line 440: “Similar climatic conditions...” like?

**Response:** We removed this section as per the suggestion of the reviewer 1.
